# Supplementary material for: Acquired melanocytic naevus phenotypes and MC1R genotypes in Han Chinese: a cross-sectional study
Source: PeerJ. 2017 Dec 20;5:e4168. doi: 10.7717/peerj.4168 (PMC5741976; doi:10.7717/peerj.4168)
Supplement: Supplemental Information 1 [file peerj-05-4168-s001.xlsx]

## Sheet: Patient data
Patient Code	Gender(F/M)	Add(Henan/Others)	Age(Year)	Ethnic Group	Occupation	Occupation- English	Freckles(Yes/No)	Freckle location	Freckle Color	Freckle Number	Worn Sunglass	Worn a Hat/Umbrella	Applied Sunscreen	Tanning Skin Type	Eye Color	Hair Color	Melanin Value: Flexual	Melanin Value: Extensor	Total Hours of Sun Exposure	PMH: Others	FMH: Others	Hospitalization Disease	Hospitalization Disease English	No.of APN: ≥2mm	No.of APN: <2mm	No.of APN: Total
1	F	Henan	25	Han	自由职业	Freelancer	Yes	face	light brown	30	2	3	3	Ⅳ	brown	black	45	47	642.5	SLE	NO	SLE	SLE	9	72	81
2	F	Henan	44	Han	农民	Farmer	No				1	1	1	Ⅳ	Light brown	dark brown	34.7	44.7	6387.5	Hepertitis	NO	过敏性紫癜	Allergic purpura	10	51	61
3	F	Henan	56	Han	退休教师	Retired Teacher	Yes	face	light brown	45	1	1	1	Ⅳ	Light brown	dark brown	56.7	74	1277.5	Hypertension	NO	病人家属	Patient's family member	5	56	61
4	F	Henan	5.5	Han	学生	Student	No				1	1	1	Ⅲ	dark brown	black	34.7	36.7	1368.7	No	NO	门诊病人黑素细胞痣	Outpatient - melanocytic nevus	8	11	19
5	F	Henan	37	Han	财务管理员	Financial administrator	No				1	2	2	Ⅳ	brown	black	19	34	912.5	No	NO	门诊病人黑素细胞痣	Outpatient - melanocytic nevus	11	50	61
6	F	Henan	35	Han	农民	Farmer	Yes	face	light brown	13	1	2	1	Ⅲ	Light brown	dark brown	57	62.3	1825	Hyperthroidism	NO	皮肌炎	Dermatomyositis	3	10	13
7	M	Henan	33	Han	办公职工	Office worker	No				1	1	1	Ⅳ	Light brown	dark brown	24.3	20	912.5	Psoriasis	银屑病	银屑病	Psoriasis	1	6	7
8	F	Henan	21	Han	服装厂职工	Garment factory worker	Yes	face	light brown	many	2	2	1	Ⅲ	Light brown	Light brown	37	41	912.5	SLE	NO	SLE	SLE	2	5	7
9	F	Henan	63	Han	清洁工	Cleaner	No				1	1	1	Ⅳ	Light brown	black	38	43	5475	Varicosity	NO	泛发性湿疹	Generalized eczema	0	4	4
10	F	Henan	29	Han	自由职业	Freelancer	No				1	1	1	Ⅲ	brown	black	27.3	32	1825	Urticaria	NO	荨麻疹	Urticaria	7	10	17
11	F	Henan	46	Han	个体经营	Self-employed	Yes	face	light brown	10	1	1	1	Ⅳ	Light brown	dark brown	26.7	32	912.5	No	NO	结节性红斑	Nodular erythema	5	7	12
12	F	Henan	49	Han	农民	Farmer	No				1	1	1	Ⅳ	Light brown	black	36.7	38.3	3650	Esophagus cancer	NO	带状疱疹	Herpes zoster	0	8	8
13	M	Henan	72	Han	退休	Retired	No				1	1	1	Ⅲ	brown	dark brown	37.7	47	456.5	Atrial fibrillation	NO	多发性疣	Multiple warts	3	6	9
14	M	Henan	59	Han	农民	Farmer	No				1	1	1	Ⅳ	Light brown	black	40.7	44.7	7300	No	NO	带状疱疹	Herpes zoster	8	15	23
15	F	Henan	45	Han	家庭妇女	Housewife	No				1	1	1	Ⅳ	Light brown	black	36.3	52.7	4562.5	No	银屑病	病人家属	Patient's family member	6	10	16
16	F	Henan	43	Han	家庭妇女	Housewife	No				1	1	1	Ⅳ	Light brown	dark brown	33	42.7	1825	Myocardial ischemia	银屑病	银屑病	Psoriasis	6	5	11
17	M	Henan	43	Han	业务员	Clerk	Yes	face	light brown	14	1	1	1	Ⅳ	Light brown	black	34.7	39	6387.5	Hypertension, Hyperlipedimia	NO	带状疱疹	Herpes zoster	5	6	11
18	F	Henan	45	Han	农民	Farmer	No				1	1	1	Ⅳ	Light brown	dark brown	54.4	53.3	7300	No	NO	嗜酸性筋膜炎	Eosinophilic fasciitis	9	28	37
19	F	Henan	10	Han	学生	Student	No				1	1	1	Ⅲ	dark brown	black	37.7	41.7	9125	Psoriasis	银屑病	银屑病	Psoriasis	4	5	9
20	F	Henan	50	Han	家庭妇女	Housewife	No				1	1	1	Ⅳ	brown	dark brown	47	56.7	3650	Hypertension, Myocardial ischemia	NO	急性荨麻疹	Acute urticaria	3	10	13
21	M	Henan	75	Han	退休	Retired	No				1	1	1	Ⅳ	Light brown	black	58.7	65	9125	Diabetes mellitus	NO	结节性痒疹	Nodular prurigo	6	8	14
22	M	Henan	52	Han	农民	Farmer	No				1	1	1	Ⅳ	Light brown	black	32.7	52	5475	Hypertension,Diabetes millitus	NO	湿疹	Eczema	0	7	7
23	M	Henan	53	Han	农民	Farmer	No				1	1	1	Ⅳ	Light brown	black	38	51.7	3285	Pulmonary emphysema	NO	荨麻疹	Urticaria	0	6	6
24	F	Henan	42	Han	家庭妇女	Housewife	No				2	2	2	Ⅳ	Light brown	dark brown	34.3	39	3650	Lupus erythematosus, Epilepsy	NO	红斑狼疮、药物疹	Lupus erythematosus, drug rash	4	20	24
25	M	Henan	39	Han	自由职业	Freelancer	No				1	1	1	Ⅲ	brown	black	38.7	47	9125	No	NO	病人家属	Patient's family member	17	12	29
26	F	Henan	43	Han	农民	Farmer	Yes	face	light brown	21	1	1	1	Ⅳ	dark brown	black	43.3	63.7	7300	No	NO	病人家属	Patient's family member	5	8	13
27	M	Shenzhen	35	Han	司机	Driver	No				1	1	1	Ⅳ	brown	black	59.3	77	4562.5	Hyperthroidism	NO	甲亢、胫前粘液性水肿	Hyperthyroidism, tibial mucus edema	5	13	18
28	M	henan	18	Han	学生	Student	No				1	1	1	Ⅳ	brown	black	48	51	3650	Acne	NO	痤疮	Acne	0	8	8
29	F	Henan	66	Han	农民	Farmer	No				1	1	1	Ⅳ	Light brown	dark brown	50	61.3	4562.5	Hypertension,Pulmonary emphysema	NO	感染性肉芽肿、结节病	Infectious granuloma, sarcoidosis	0	5	5
30	M	Xinjiang	46	Han	职员	Staff	Yes	face	light brown	11	1	1	1	Ⅲ	Light brown	black	37.3	63.3	912.5	Hypertension, Stasis dermatitis	NO	赘积性皮炎、高血压	Juvenile dermatitis, high blood pressure	4	7	11
31	F	Henan	28	Han	农民	Farmer	No				1	1	1	Ⅳ	dark brown	dark brown	40	45	8212.5	No	NO	结节性痒疹	Nodular prurigo	0	9	9
32	F	Henan	70	Han	农民	Farmer	No				1	1	1	Ⅳ	Light brown	black	59.3	97.7	5475	No	NO	带状疱疹	Herpes zoster	0	6	6
33	F	Henan	58	Han	家庭妇女	Housewife	No				1	1	1	Ⅲ	brown	dark brown	39.7	49.3	3650	No	NO	带状疱疹	Herpes zoster	0	5	5
34	F	Henan	19	Han	学生	Student	No				1	2	2	Ⅲ	brown	dark brown	38.3	40	1825	No	NO	荨麻疹	Urticaria	0	7	7
35	F	Henan	12	Han	学生	Student	No				1	1	1	Ⅳ	dark brown	black	73.7	75.7	7300	Psoriasis	银屑病	银屑病	Psoriasis	0	4	4
36	M	Henan	41	Han	办公职员	Office worker	No				1	1	1	Ⅳ	Light brown	dark brown	34	44.3	2737.5	Psoriasis	银屑病	银屑病	Psoriasis	8	9	17
37	M	Henan	63	Han	农民	Farmer	No				1	1	1	Ⅳ	brown	dark brown	53.7	74	912.5	No	No	固定性药疹	Fixed drug rash	3	7	10
38	F	Henan	40	Han	自由职业	Freelancer	Yes	face	light brown	45	2	3	2	Ⅲ	Light brown	dark brown	26.3	37.3	1825	No	No	女阴溃疡、疱疹	Herpes on vulva	4	13	17
39	M	Henan	43	Han	外地打工	Field worker	No				1	1	1	Ⅳ	dark brown	black	55	70	2737.5	No	No	病人家属	Patient's family member	14	9	23
40	F	Henan	40	Han	家庭妇女	Housewife	No				1	1	1	Ⅳ	Light brown	dark brown	24	40	547.5	No	NO	结节性红斑	Nodular erythema	0	7	7
41	F	Fujian	36	Han	业务员	Clerk	Yes	face	light brown	14	2	2	2	Ⅲ	Light brown	Light brown	27.3	34.3	4562.5	No	No	急性荨麻疹	Acute urticaria	13	27	40
42	M	Henan	73	Han	退休	Retired	No				1	1	1	Ⅲ	Light brown	black	43.3	48.7	2737.5	No	No	湿疹	Eczema	2	6	8
43	F	Henan	30	Han	自由职业	Freelancer	No				2	3	2	Ⅳ	brown	black	51.3	64.3	4562.5	No	No	荨麻疹	Urticaria	3	7	10
44	M	Henan	63	Han	退休	Retired	No				1	1	1	Ⅳ	Light brown	dark brown	55	53.7	912.5	No	No	湿疹	Eczema	4	11	15
45	F	Henan	47	Han	卖水果	Fruit seller	Yes	face	light brown	23	1	1	1	Ⅳ	Light brown	black	54.3	75	9125	No	No	带状疱疹	Herpes zoster	1	12	13
46	F	Henan	42	Han	家具店	Furniture store worker	No				1	1	1	Ⅳ	brown	dark brown	46	47.7	4562.5	No	No	湿疹	Eczema	7	9	16
47	M	Anwei	83	Han	退休	Retired	No				1	1	1	Ⅲ	Light brown	dark brown	32.3	36	2737.5	Diabetes millitus,Cerebral Infarction	No	带状疱疹	Herpes zoster	0	6	6
48	F	Henan	32	Han	医师	Physician	Yes	face	light brown	45	1	2	2	Ⅲ	Light brown	Light brown	32.7	46.7	912.5	No	No	无	None	2	10	12
49	F	Henan	57	Han	农民	Farmer	No				1	1	1	Ⅳ	Light brown	black	61.3	69.3	7300	No	No	慢性荨麻疹	Chronic urticaria	8	12	20
50	M	Henan	25	Han	自由职业	Freelancer	No				1	1	1	Ⅳ	brown	dark brown	40.7	47.7	2737.5	No	No	白塞病	Behcet's disease	24	28	52
51	F	Henan	33	Han	农民	Farmer	No				1	1	1	Ⅳ	brown	dark brown	44	91.7	4562.5	No	No	植物日光性皮炎	Plant solar dermatitis	4	8	12
52	M	Henan	39	Han	职员	Staff	No				1	1	1	Ⅳ	brown	black	56.7	75	1825	Psoriasis	No	银屑病	Psoriasis	0	7	7
53	F	Henan	16	Han	学生	Student	No				1	1	1	Ⅲ	dark brown	dark brown	28.7	47.3	3650	No	No	急性荨麻疹	Acute urticaria	3	6	9
54	M	Henan	12	Han	学生	Student	No				1	1	1	Ⅲ	brown	black	52.3	62.7	4562.5	No	No	荨麻疹	Urticaria	0	4	4
55	F	Guizhou	33	Han	卡车机器厂	Truck machinery factory	Yes	face	light brown	26	1	2	1	Ⅲ	Light brown	dark brown	34.3	41	912.5	No	No	血管性水肿	Vascular edema	0	15	15
56	M	Henan	37	Han	职员	Staff	No				1	1	1	Ⅳ	brown	black	51.3	59.7	5475	No	No	尖锐湿疣	Condyloma acuminata	0	9	9
57	F	Henan	35	Han	自由职业	Freelancer	Yes	face	light brown	20	2	3	3	Ⅲ	Light brown	dark brown	53	61.7	1825	Femoral head necrosis	No	SLE	SLE	0	12	12
58	F	Henan	14	Han	学生	Student	No				1	1	1	Ⅳ	dark brown	black	50	62.3	5475	No	No	嗜酸性筋膜炎	Eosinophilic fasciitis	0	6	6
59	M	Henan	43	Han	职员	Staff	Yes	face	light brown	15	1	1	1	Ⅳ	Light brown	dark brown	29.7	41.7	3650	Letent herpetitis B	No	淋巴瘤样丘疹病	Lymphoma-like papulosis	0	7	7
60	F	Henan	38	Han	办公职员	Office worker	No				2	3	3	Ⅲ	Light brown	brown	45.3	65.3	912.5	No	No	日光性皮炎	Solar dermatitis	1	6	7
61	M	Henan	41	Han	农民	Farmer	No				1	1	1	Ⅳ	Light brown	black	93.7	96.3	7300	Psoriatic arthritis	银屑病	关节病型银屑病、强直性脊柱炎	Arthritis psoriasis, ankylosing spondylitis	11	17	28
62	M	Henan	51	Han	自由职业	Freelancer	No				1	1	1	Ⅳ	Light brown	black	54.3	98.3	7300	No	NO	足癣并发感染	Tinea pedis complicated with infection	0	7	7
63	M	Henan	25	Han	职员	Staff	No				1	1	1	Ⅳ	dark brown	black	46	51	5475	No	No	多形红斑	Erythema multiforme	0	8	8
64	F	Henan	43	Han	家庭妇女	Housewife	Yes	face	light brown	19	1	2	2	Ⅲ	Light brown	dark brown	42.3	54.3	1825	Eczema	No	泛发型湿疹	Generalized eczema	0	3	3
65	F	Henan	56	Han	农民	Farmer	No				1	1	1	Ⅳ	Light brown	black	31	45	6387.5	No	No	带状疱疹	Herpes zoster	4	12	16
66	M	Henan	24	Han	送货员	Dispatcher	No				1	1	1	Ⅳ	Light brown	black	44.7	62.7	5475	No	No	感染性荨麻疹	Infectious urticaria	1	15	16
67	M	Henan	43	Han	自由职业	Freelancer	No				1	1	1	Ⅳ	brown	black	53.3	65.7	4562.5	Psoriasis	No	银屑病	Psoriasis	4	5	9
68	M	Henan	17	Han	学生	Student	No				1	1	1	Ⅳ	brown	black	41	47.3	1825	No	No	囊肿性痤疮	Cystic acne	5	7	12
69	M	Henan	31	Han	职员	Staff	No				1	1	1	Ⅲ	dark brown	dark brown	31.7	35	912.5	Urticaria	No	荨麻疹	Urticaria	0	6	6
70	M	Henan	16	Han	学生	Student	No				1	1	1	Ⅲ	brown	black	49.7	54.7	2737.5	No	No	副银屑病	Psoriasis	0	5	5
71	F	Henan	27	Han	打工	Worker	No				1	2	2	Ⅲ	brown	black	37.7	44.7	2737.5	No	No	坏死性血管炎	Necrotizing vasculitis	6	6	12
72	M	Henan	25	Han	职员	Staff	No				1	1	1	Ⅳ	dark brown	black	58.7	79.3	4562.5	No	No	瘢痕疙瘩	Keloid	5	7	12
73	F	Henan	54	Han	家庭妇女	Housewife	Yes	face	light brown	23	1	1	1	Ⅳ	Light brown	dark brown	34.3	50	3650	No	No	带状疱疹后遗神经痛	Herpes zoster neuralgia	2	7	9
74	F	Shenzhen	57	Han	教师退休	Retired Teacher	No				1	2	1	Ⅲ	Light brown	Light brown	42.3	58.7	2737.5	Undifferential connect tissue disease	No	带状疱疹	Herpes zoster	3	19	22
75	M	Henan	42	Han	职员	Staff	No				1	1	1	Ⅲ	Light brown	black	47.7	56.3	4562.5	Hypertension	No	湿疹	Eczema	12	51	63
76	F	Henan	26	Han	在家休养	No Data	No				1	2	2	Ⅲ	brown	black	46.3	52.7	912.5	No	No	荨麻疹	Urticaria	7	6	13
77	F	Henan	10	Han	学生	Student	No				1	1	1	Ⅲ	dark brown	black	49.3	64.7	3650	No	No	药疹	Drug rash	0	8	8
78	M	Henan	49	Han	农民	Farmer	No				1	1	1	Ⅳ	Light brown	dark brown	59.3	66.7	1825	No	No	荨麻疹	Urticaria	0	7	7
79	M	Henan	11	Han	学生	Student	No				1	1	1	Ⅲ	dark brown	black	48	65.7	5475	No	No	变应性血管炎	Allergic vasculitis	0	5	5
80	M	Henan	48	Han	职员	Staff	No				1	1	1	Ⅳ	brown	dark brown	58	74	4562.5	Diabetes millitus, Bladder concer	NO	虫咬皮炎	Insect bite dermatitis	0	10	10
81	F	Henan	29	Han	农民	Farmer	Yes	face	light brown	31	1	1	1	Ⅳ	dark brown	black	44.3	54.3	7300	No	NO	病人家属	Patient's family member	2	12	14
82	M	Henan	32	Han	农民	Farmer	No				1	1	1	Ⅳ	brown	black	53	55.7	7300	No	银屑病	关节病型银屑病	Arthritis psoriasis	8	9	17
83	M	Henan	18	Han	学生	Student	No				1	2	2	Ⅲ	brown	dark brown	43	51	912.5	No	银屑病	银屑病	Psoriasis	1	6	7
84	M	Henan	33	Han	护理	Carer	No				1	2	1	Ⅳ	Light brown	black	50.3	79.3	3650	No	NO	病人家属	Patient's family member	6	15	21
85	F	Henan	20	Han	学生	Student	No				1	2	1	Ⅲ	brown	dark brown	40.3	55	2735.5	Psoriasis	银屑病	系统性红斑狼疮	Systemic lupus erythematosus	0	11	11
86	F	Henan	46	Han	农民	Farmer	No				1	1	1	Ⅲ	Light brown	brown	78.3	87	6022.5	SLE	NO	带状疱疹	Herpes zoster	0	9	9
87	F	Henan	39	Han	打工	Worker	No				1	1	1	Ⅳ	brown	black	56.7	80	6387.5	No	NO	急性发热性嗜中性皮病	Acute febrile neutropenia	0	12	12
88	M	Henan	60	Han	煤矿工人退休	Retired coal miner	No				1	1	1	Ⅲ	Light brown	black	64.3	85	3650	No	NO	湿疹	Eczema	0	7	7
89	F	Henan	48	Han	家庭妇女	Housewife	No				1	1	1	Ⅳ	brown	dark brown	53.7	70.3	4562.5	No	NO	酒渣性皮炎	Dregs dermatitis	2	10	12
90	F	Henan	55	Han	菜市场	Vegetable market worker	No				1	1	1	Ⅳ	Light brown	dark brown	53.3	64	7300	No	NO	寻常型天疱疮	Pemphigus vulgaris	12	14	26
91	M	Henan	74	Han	农民	Farmer	No				1	1	1	Ⅳ	Light brown	black	99	99	10037.5	Prurigo nodularis, Conorary heart disease,chronic obstructive pulmonary emphysema, Venous thrombus	NO	带状疱疹	Herpes zoster	0	5	5
92	M	Henan	9	Han	学生	Student	No				1	1	1	Ⅲ	dark brown	black	52	57.7	9125	No	NO	急性荨麻疹	Acute urticaria	0	6	6
93	M	Henan	39	Han	酒店服务员	Hotel staff	No				1	1	1	Ⅳ	Light brown	dark brown	42.7	43	608.3	No	NO	螺旋体病	Spirochetes disease	8	9	17
94	F	Henan	22	Han	律师事务所	Law office worker	No				1	2	2	Ⅲ	brown	dark brown	31.7	43.7	1825	No	NO	玫瑰糠疹	Pityriasis rosea	2	7	9
95	M	Henan	44	Han	酒店	Hotel staff	No				1	1	1	Ⅳ	Light brown	black	49.3	62	1825	No	NO	带状疱疹	Herpes zoster	1	5	6
96	M	Henan	25	Han	职员	Staff	Yes	face	light brown	many	1	1	1	Ⅲ	Light brown	dark brown	60	63	2737.5	No	NO	系统性红斑狼疮	Systemic lupus erythematosus	1	6	7
97	F	Henan	39	Han	卖早餐	Breakfast seller	No				1	1	1	Ⅳ	brown	black	46	56	4562.5	No	NO	局限性硬皮病	Localized scleroderma	2	7	9
98	F	Henan	44	Han	农民	Farmer	No				1	1	1	Ⅳ	brown	dark brown	41	66	6387.5	No	NO	急性荨麻疹	Acute urticaria	1	10	11
99	M	Henan	65	Han	农民	Farmer	No				1	2	1	Ⅲ	Light brown	black	41	54.3	5475	No	NO	系统性红斑狼疮	Systemic lupus erythematosus	1	8	9
100	F	Henan	52	Han	农民	Farmer	No				1	1	1	Ⅳ	Light brown	dark brown	50	60.7	5292.5	No	NO	带状疱疹	Herpes zoster	1	9	10
101	M	Henan	30	Han	自由职业	Freelancer	Yes	face	light brown	49	1	1	1	Ⅲ	Light brown	brown	44	58.3	5475	No	NO	扁平苔癣	Lichen planus	7	4	11
102	M	Henan	22	Han	职员	Staff					1	1	1	Ⅳ	brown	black	46	63.3	3650	No	NO	荨麻疹	Urticaria	5	7	12
103	M	Henan	10	Han	学生	Student	No				1	1	1	Ⅳ	dark brown	black	39.3	39.7	8212.5	No	银屑病	银屑病	Psoriasis	3	5	8
104	F	Henan	57	Han	家庭妇女	Housewife	No				1	1	1	Ⅲ	Light brown	dark brown	67	80.7	5475	No	NO	带状疱疹	Herpes zoster	1	6	7
105	F	Henan	35	Han	农民	Farmer	No				1	1	1	Ⅳ	brown	black	56.7	68	8212.5	No	银屑病	银屑病	Psoriasis	7	10	17
106	F	Henan	23	Han	职员	Staff	No				2	3	3	Ⅲ	brown	dark brown	48	49.7	912.5	No	NO	过敏性紫癜	Allergic purpura	3	4	7
107	F	Henan	47	Han	农民	Farmer	No				1	1	1	Ⅲ	Light brown	dark brown	55.7	68.7	6387.5	Encephalorrhagia	NO	皮肌炎	Dermatomyositis	14	13	27
108	F	Henan	24	Han	医师	Physician	No				1	2	2	Ⅲ	dark brown	black		32	41	No	NO	无	None	2	4	6
109	M	Henan	24	Han	职员	Staff	No				1	1	1	Ⅳ	brown	black	42.3	49	3650	Psoriasis	银屑病	银屑病	Psoriasis	7	9	16
110	F	Henan	23	Han	瑜伽教练	Yoga instructor	No				1	3	2	Ⅲ	Light brown	Light brown	35	45.7	2737.5	No	NO	猩红热样红斑	Scarlet hop sample erythema	0	1	1
111	F	Henan	23	Han	实习医师	Intern	No				1	2	1	Ⅳ	dark brown	black	52.7	65	1825	No	NO	无	None	6	8	14
112	F	Henan	26	Han	医师	Physician	Yes	face	light brown	20	1	3	2	Ⅲ	brown	dark brown	29.7	32	912.5	No	NO	无	None	6	2	8
113	F	Henan	26	Han	医师	Physician	No				1	2	2	Ⅲ	brown	dark brown	42	50	912.5	No	NO	无	None	21	12	33
114	F	Jilin	25	Han	医师	Physician	No				1	2	2	Ⅳ	dark brown	black	34.3	46.3	1216.7	No	NO	无	None	7	4	11
115	F	Henan	26	Han	护士	Nurse	No				1	2	2	Ⅲ	dark brown	black	34.7	44.7	912.5	No	NO	无	None	4	7	11

## Sheet: Nevus details
Patient Code	Patient Code	Lesion Code	Location	Color	Surface	Flat or Elevated	Total number	Number of Nevi ≥2mm	Number of Nevi≥5mm	Maximum Diameter	Symptom	Dermoscopic features	Local Feature: Pigmented	Signature pattern	Local Feature: Vessel	Clinical subtyping		Signature pattern
1	1	1	Neck	Black	Smooth	Mildly elevated	9	6	3	2mm	Asymptomatic	non-specific	Pigmentation		-	c
	1	2	Neck	Dark brown	Smooth	Flat				3mm	Asymptomatic	non-specific	Pseudonetwork		-	c/j
	1	3	Neck	Dark brown	Coarse	Markedly elevated				5mm	Asymptomatic	Globular	Globules		-	c
	1	4	Genital area	Dark brown	Smooth	Flat				2mm	Asymptomatic	non-specific	Pigmentation		-	c/j
	1	5	Genital area	Dark brown	Smooth	Mildly elevated				5mm	Asymptomatic	non-specific	Pigmentation, White veil		-	c
	1	6	Genital area	Dark brown	Smooth	Flat				2mm	Asymptomatic	non-specific				c/j
	1	7	Genital area	Dark brown	Smooth	Mildly elevated				4mm	Asymptomatic	Globular	Globules, White veil		-	c
	1	8	Genital area	Dark brown	Smooth	Mildly elevated				7mm	Asymptomatic	Globular	Globules, White veil		-	c
	1	9	Palms and soles	Dark brown	Smooth	Flat				3mm	Asymptomatic	Globular	Pigmentation	N and G	-	c/j
2	2	1	Scalp	Light brown	Papillomatous	Markedly elevated	10	7	3	7mm	Asymptomatic	Globular	Globules		Dot, Linear, Comma like	i
	2	2	Scalp	Light brown	Papillomatous	Markedly elevated				6mm	Asymptomatic	Globular	Globules, Pigmentation		Linear, Comma like	c
	2	3	Scalp	Flesh	Smooth	Mildly elevated				4mm	Asymptomatic	non-specific				i
	2	4	Scalp	Dark brown	Smooth	Mildly elevated				3mm	Asymptomatic	non-specific	Globules		-	c
	2	5	Neck	Dark brown	Smooth	Mildly elevated				2mm	Asymptomatic	non-specific	Pigmentation, White veil		-	c
	2	6	Neck	Dark brown	Coarse	Mildly elevated				5mm	Asymptomatic	Globular	Globules		Linear, Comma like	c
	2	7	Neck	Dark brown	Smooth	Mildly elevated				3mm	Asymptomatic	non-specific	Pigmentation		-	c
	2	8	Genital area	Dark brown	Smooth	Flat				3mm	Asymptomatic	non-specific	Pseudonetwork		-	c/j
	2	9	Genital area	Dark brown	Papillomatous	Markedly elevated				3mm	Asymptomatic	Globular	Globules		-	i
	2	10	Face	Black Blue	Smooth	Flat				2mm	Asymptomatic	non-specific	Pigmentation，White veil	N and G	-	i(blue nevus)
3	3	1	Extremities	Dark brown	Smooth	Mildly elevated	5	4	1	2mm	Asymptomatic	non-specific	Pigment network, White veil		-	c
	3	2	Extremities	Dark brown	Smooth	Mildly elevated				2mm	Asymptomatic	non-specific	Pigmentation		-	c
	3	3	Trunk	Dark brown	Smooth	Mildly elevated				4mm	Asymptomatic	non-specific	Pigmentation, Pigment network, Blue-whitish weil		-	c
	3	4	Trunk	Dark brown	Smooth	Mildly elevated				3mm	Asymptomatic	non-specific	Pigmentation		-	c
	3	5	Trunk	Black Blue	Smooth	Mildly elevated				5mm	Asymptomatic	non-specific	Pigmentation	N	-	c
4	4	1	Others(右耳后)	Dark brown	Smooth	Flat	8	8	0	4mm	Asymptomatic	non-specific	Pigmentation		-	d
	4	2	Neck	Dark brown	Smooth	Flat				2mm	Asymptomatic	non-specific	Pigmentation		-	c/j
	4	3	Trunk	Dark brown	Smooth	Flat				3mm	Asymptomatic	Reticular	Pigment network		-	c/j
	4	4	Trunk	Dark brown	Smooth	Flat				4mm	Asymptomatic	non-specific	Pigment network， Dots		-	c/j
	4	5	Extremities	Dark brown	Smooth	Flat				4mm	Asymptomatic	Reticular	Pigment network		-	c/j
	4	6	Extremities	Light brown	Smooth	Flat				2mm	Asymptomatic	non-specific	Pigmentation		-	c/j
	4	7	Extremities	Light brown	Smooth	Flat				2mm	Asymptomatic	Reticular	Pigment network		-	c/j
	4	8	Extremities	Light brown	Smooth	Flat				2mm	Asymptomatic	Reticular		N and R		c/j
5	5	1	Neck	Dark brown	Smooth	Flat	11	11	0	2mm	Asymptomatic	non-specific	Pigmentation		-	c/j
	5	2	Face	Light brown	Smooth	Flat				3mm	Asymptomatic	non-specific	Pigmentation		-	c/j
	5	3	Neck	Light brown	Smooth	Flat				3mm	Asymptomatic	non-specific	Pigmentation		-	c/j
	5	4	Extremities	Light brown	Smooth	Flat				2mm	Asymptomatic	non-specific	Pigment network		-	c/j
	5	5	Extremities	Light brown	Smooth	Flat				3mm	Asymptomatic	non-specific	Pigmentation		-	c/j
	5	6	Neck	Light brown	Smooth	Flat				3mm	Asymptomatic	non-specific	Pigmentation		-	c/j
	5	7	Trunk	Light brown	Smooth	Flat				2mm	Asymptomatic	Reticular	Pigment network		-	c/j
	5	8	Trunk	Light brown	Smooth	Flat				4mm	Asymptomatic	non-specific	Pigmentation，Blue-whitish veil		-	c/j
	5	9	Genital area	Light brown	Smooth	Flat				3mm	Asymptomatic	non-specific	Pigmentation		-	c/j
	5	10	Genital area	Light brown	Smooth	Flat				2mm	Asymptomatic	non-specific	Pigmentation		-	c/j
	5	11	Genital area	Light brown	Smooth	Flat				2mm	Asymptomatic	non-specific	Pigmentation	N	-	c/j
6	6	1	Neck	Light brown	Smooth	Flat	3	3	0	2mm	Asymptomatic	non-specific	Pigmentation，Pseudonetwork		-	c/j
	6	2	Genital area	Light brown	Smooth	Flat				2mm	Asymptomatic	Reticular	Pigment network		-	c/j
	6	3	Extremities	Light brown	Smooth	Flat				3mm	Asymptomatic	non-specific	Pigmentation, Regression	N and R	-	c/j
7	7	2	Neck	Light brown	Smooth	Flat	1	1	0	2mm	Asymptomatic	non-specific	Pigment network, Pigmentation	N	-	c/j
8	8	1	Others(右耳)	Light brown	Smooth	Flat	2	2	0	2mm	Asymptomatic	non-specific	Pigmentation, Dots		-	c/j
	8	2	Trunk	Light brown	Coarse	Mildly elevated				2.5mm	Asymptomatic	non-specific	Pigmentation，White veil	N	-	c
10	10	1	Face	Light brown	Smooth	Flat	7	7	0	2mm	Asymptomatic	non-specific	Peudonetwork, Pigment network		-	c/j
	10	2	Face	Light brown	Smooth	Flat				2mm	Asymptomatic	non-specific	Pigmentation		-	c/j
	10	3	Face	Black	Smooth	Mildly elevated				2mm	Asymptomatic	Reticular	Pigmentation		-	c
	10	4	Genital area	Light brown	Smooth	Flat				2.5mm	Asymptomatic	non-specific	Pigmentation		-	c/j
	10	5	Extremities	Light brown	Smooth	Flat				3mm	Asymptomatic	non-specific	Pigmentation		-	c/j
	10	6	Genital area	Light brown	Smooth	Flat				2mm	Asymptomatic	non-specific	Pigment network, Pigmentation		-	c/j
	10	7	Extremities	Light brown	Smooth	Mildly elevated				3.5mm	Asymptomatic	Globular	Globules	N	-	c
11	11	1	Extremities	Light brown	Smooth	Flat	5	4	1	4mm	Asymptomatic	non-specific	Pigmentation，White veil		-	c/j
	11	2	Genital area	Light brown	Smooth	Flat				3mm	Asymptomatic	Reticular	Pigment network		-	c/j
	11	3	Genital area	Flesh	Smooth	Mildly elevated				3mm	Asymptomatic	non-specific	Flesh-colored, Milia-like cyst		-	i
	11	4	Palms and soles	Light brown	Smooth	Flat				3mm	Asymptomatic	non-specific	Lattice-like pattern		-	c/j
	11	5	Face	Light brown	Smooth	Mildly elevated				5mm	Asymptomatic	non-specific	Pigmentation	N	-	i
13	13	2	Face	Light brown	Smooth	Mildly elevated	3	2	1	4mm	Asymptomatic	non-specific	Peudonetwork,		-	c
	13	3	Face	Light brown	Smooth	Mildly elevated				5mm	Asymptomatic	Reticular	Peudonetwork,		-	i
	13	4	Genital area	Light brown	Smooth	Flat				2mm	Asymptomatic	non-specific	Peudonetwork,	N and R	-	c/j
14	14	1	Extremities	Flesh	Smooth	Markedly elevated	8	6	2	6mm	Asymptomatic	non-specific	Flesh-colored		-	i
	14	2	Trunk	Light brown	Smooth	Flat				2mm	Asymptomatic	non-specific	Pigmentation		-	c/j
	14	3	Trunk	Light brown	Coarse	Mildly elevated				6mm	Asymptomatic	non-specific	Pigmentation，Blue-whitish veil		Glomerular	c
	14	4	Trunk	Dark brown	Coarse	Flat				3mm	Asymptomatic	non-specific	Pigmentation		-	c/j
	14	5	Trunk	Light brown	Smooth	Flat				2mm	Asymptomatic	non-specific	Pigmentation		-	c/j
	14	6	Trunk	Light brown	Coarse	Mildly elevated				4mm	Asymptomatic	non-specific	Pigmentation		-	i
	14	7	Trunk	Dark brown	Smooth	Flat				2mm	Asymptomatic	non-specific	Pigmentation		-	c/j
	14	8	Trunk	Light brown	Smooth	Flat				2mm	Asymptomatic	non-specific	Pigmentation	N	-	c/j
15	15	1	Face	Dark brown	Papillomatous	Markedly elevated	6	2	4	8mm	Itchy	Globular	Pigmentation，Globules, Dots		Linear	c
	15	2	Face	Dark brown	Coarse	Mildly elevated				2mm	Itchy	non-specific	Pigmentation，White veil		-	c
	15	3	Neck	Dark brown	coarse	Mildly elevated				5mm	Asymptomatic	Globular	Globules		-	c
	15	5	Extremities	Light brown	Smooth	Flat				3mm	Asymptomatic	non-specific	Pigmentation		-	c/j
	15	6	Extremities	Dark brown	Papillomatous	Markedly elevated				5mm	Asymptomatic	non-specific	Pigmentation，Globules, White vell		-	c
	15	7	Trunk	Black	Papillomatous	Markedly elevated				8mm	Asymptomatic	non-specific	Pigmentation, White vell	N and G	-	c
16	16	1	Face	Light brown	Coarse	Flat	6	4	2	3mm	Asymptomatic	non-specific	Pigmentation		-	c/j
	16	2	Face	Light brown	Smooth	Mildly elevated				4mm	Asymptomatic	Reticular	Pigmentation		-	c/j
	16	3	Face	Light brown	Smooth	Mildly elevated				3mm	Asymptomatic	Globular	Pigmentation		-	c
	16	4	Trunk	Light brown	Papillomatous	Markedly elevated				7mm	Asymptomatic	non-specific	Pigmentation， Comedo-like opening,		Comma like	i
	16	5	Trunk	Light brown	Smooth	Mildly elevated				4mm	Asymptomatic	non-specific	Pigmentation， White veil		-	i
	16	6	Trunk	Light brown	Coarse	Mildly elevated				5mm	Asymptomatic	non-specific	Pigmentation	N	-	c
17	17	1	Scalp	Light brown	Smooth	Flat	5	5	0	3mm	Asymptomatic	Reticular	Pseudonetwork		-	c/j
	17	2	Scalp	Light brown	Smooth	Flat				2mm	Asymptomatic	non-specific	Pseudonetwork		-	c/j
	17	3	Trunk	Dark brown	Coarse	Mildly elevated				2mm	Asymptomatic	non-specific	Pigmentation， Blue-Whitish veil		-	c
	17	5	Extremities	Light brown	Smooth	Flat				3mm	Asymptomatic	non-specific	Pigmentation		-	c/j
	17	6	Extremities	Light brown	Smooth	Flat				2mm	Asymptomatic	non-specific	Pigmentation	N	-	c/j
18	18	1	Extremities	Dark brown	Smooth	Flat	9	9	0	2mm	Asymptomatic	Reticular	Pigment network, Pigmentation		-	c/j
	18	2	Extremities	Light brown	Smooth	Flat				2mm	Asymptomatic	Reticular	Pigment network		-	c/j
	18	3	Extremities	Light brown	Smooth	Flat				2mm	Asymptomatic	Reticular	Pigment network, Pigmentation		-	c/j
	18	4	Trunk	Light brown	Coarse	Flat				2mm	Asymptomatic	non-specific	Pigment network, Pigmentation		-	c/j
	18	5	Trunk	Dark brown	Smooth	Flat				2mm	Asymptomatic	Reticular	Pigment network, Pigmentation		-	c/j
	18	6	Extremities	Light brown	Smooth	Flat				2mm	Asymptomatic	Reticular	Pigment network		-	c/j
	18	7	Extremities	Dark brown	Smooth	Flat				2mm	Asymptomatic	non-specific	Pigment network		-	c/j
	18	8	Extremities	Light brown	Smooth	Flat				2mm	Asymptomatic	Reticular	Pigment network		-	c/j
	18	9	Extremities	Black	Smooth	Flat				3mm	Asymptomatic	non-specific	Pigmentation	N and R	-	c/j
19	19	1	Palms and soles	Dark brown	Smooth	Flat	4	4	0	4mm	Asymptomatic	non-specific	Parallel ridge, Fibrillar		-	c/j
	19	2	Extremities	Light brown	Smooth	Flat				2mm	Asymptomatic	Reticular	Pigment network, Pigmentation		-	c/j
	19	3	Scalp	Dark brown	Coarse	Flat				3mm	Asymptomatic	Globular	Globules, Pseudonetwork		-	c/j
	19	4	Neck	Dark brown	Coarse	Flat				2mm	Asymptomatic	Globular	Globules	G	-	c/j
20	20	1	Trunk	Black	Coarse	Mildly elevated	3	2	1	8mm	Asymptomatic	non-specific	Pigmentation， White veil		-	i
	20	4	Extremities	Light brown	Smooth	Flat				2mm	Asymptomatic	non-specific	Streaks		-	c/j
	20	5	Trunk	Dark brown	Coarse	Flat				3mm	Asymptomatic	non-specific	Pigment network, Pigmentation	N	-	c/j
21	21	1	Neck	Black	Smooth	Flat	6	5	1	3mm	Asymptomatic	non-specific	Pigmentation， White veil		-	c/j
	21	2	Neck	Black	Coarse	Mildly elevated				7mm	Asymptomatic	non-specific	Pigmentation		-	c
	21	3	Neck	Dark brown	Coarse	Mildly elevated				2mm	Asymptomatic	non-specific	Pigmentation， Dot		-	c
	21	4	Face	Light brown	Smooth	Flat				3mm	Asymptomatic	Reticular	Pseudonetwork		-	c/j
	21	5	Trunk	Dark brown	Coarse	Mildly elevated				2mm	Asymptomatic	non-specific	Pigmentation，White veil, Globule		-	c
	21	6	Trunk	Dark brown	Smooth	Flat				2mm	Asymptomatic	non-specific	Pigmentation， White veil	N	-	c/j
24	24	1	Trunk	Flesh	Smooth	Flat	4	4	0	2mm	Asymptomatic	non-specific	Pigmentation		-	c/j
	24	2	Extremities	Light brown	Smooth	Flat				2mm	Asymptomatic	non-specific	Pigmentation		-	c/j
	24	3	Face	Dark brown	Smooth	Flat				2mm	Asymptomatic	non-specific	Pigmentation		-	c/j
	24	4	Neck	Light brown	Smooth	Flat				2.5mm	Asymptomatic	non-specific	Pigmentation	N	-	c/j
25	25	1	Face	Light brown	Coarse	Mildly elevated	17	17	0	4mm	Asymptomatic	Reticular	Pseudonetwork		Comma like	i
	25	2	Face	Light brown	Coarse	Mildly elevated				3mm	Asymptomatic	non-specific	Pigmentation， Globule		-	c
	25	3	Face	Dark brown	Coarse	Mildly elevated				2mm	Asymptomatic	Reticular	Pseudonetwork		Comma like	c
	25	4	Extremities	Light brown	Smooth	Flat				3mm	Asymptomatic	Reticular	Streaks， Pigment network		-	c/j
	25	5	Neck	Flesh	Smooth	Markedly elevated				3mm	Asymptomatic	non-specific	Pigmentation		Dotted	i
	25	6	Trunk	Light brown	Smooth	Mildly elevated				2mm	Asymptomatic	non-specific	Pigmentation， White veil		-	i
	25	7	Neck	Dark brown	Coarse	Mildly elevated				2mm	Asymptomatic	non-specific	Pigmentation		-	c
	25	8	Trunk	Others	Papillomatous	Markedly elevated				4mm	Asymptomatic	non-specific	Pigmentation		Dotted	c
	25	9	Trunk	Others	Papillomatous	Markedly elevated				3mm	Asymptomatic	non-specific	Pigmentation， White veil		Comma like, Linear	c
	25	10	Trunk	Light brown	Coarse	Mildly elevated				4mm	Asymptomatic	non-specific	Pigmentation		-	c
	25	11	Trunk	Light brown	Smooth	Flat				2mm	Asymptomatic	Reticular	Pigment network, Pigmentation		-	c/j
	25	12	Trunk	Dark brown	Coarse	Flat				2mm	Asymptomatic	non-specific	Pigmentation		-	c/j
	25	13	Trunk	Dark brown	Papillomatous	Markedly elevated				3mm	Asymptomatic	non-specific	Pigmentation， White veil		-	c
	25	14	Trunk	Dark brown	Smooth	Flat				2mm	Asymptomatic	non-specific	Pigmentation		-	c/j
	25	15	Trunk	Light brown	Smooth	Flat				2.5mm	Asymptomatic	non-specific	Pigmentation， White veil		-	c/j
	25	17	Extremities	Light brown	Smooth	Flat				3mm	Asymptomatic	Reticular	Pseudonetwork		-	c/j
	25	19	Genital area	Light brown	Smooth	Flat				2mm	Asymptomatic	Reticular		N and R		c/j
26	26	1	Neck	Dark brown	Coarse	Mildly elevated	5	5	0	3mm	Asymptomatic	non-specific	Pigmentation, Comedo-like opening		-	c
	26	2	Neck	Light brown	Smooth	Flat				2mm	Asymptomatic	non-specific	Pigmentation, Pseudonetwork		-	c/j
	26	3	Neck	Light brown	Smooth	Flat				2mm	Asymptomatic	Reticular	Pigment network		-	c/j
	26	4	Trunk	Light brown	Smooth	Flat				2mm	Asymptomatic	non-specific	Pigmentation		-	c/j
	26	6	Extremities	Dark brown	Smooth	Flat				3mm	Asymptomatic	non-specific	Pigmentation	N	-	c/j
27	27	1	Trunk	Dark brown	Papillomatous	Mildly elevated	5	4	1	5mm	Asymptomatic	non-specific	Pigmentation		-	c
	27	2	Trunk	Light brown	Papillomatous	Mildly elevated				4mm	Asymptomatic	Globular	Globules		-	c
	27	3	Extremities	Light brown	Smooth	Flat				4mm	Asymptomatic	non-specific	Pigmentation， Globules		-	c/j
	27	4	Trunk	Light brown	Smooth	Flat				2mm	Asymptomatic	Reticular	Pigment network		-	c/j
	27	6	Neck	Light brown	Smooth	Flat				2mm	Asymptomatic	non-specific	Pigmentation， Pseudonetwork	N	-	c/j
30	30	1	Trunk	Dark brown	Smooth	Flat	4	4	0	4mm	Asymptomatic	Reticular	Pigment network		-	c/j
	30	2	Face	Others	Smooth	Flat				2mm	Asymptomatic	Reticular	Pseudonetwork, White veil		Linear	c/j
	30	3	Face	Dark brown	Smooth	Flat				2mm	Asymptomatic	non-specific	Pigmentation		-	c/j
	30	4	Extremities	Light brown	Smooth	Flat				2mm	Asymptomatic	non-specific	Pigmentation	N and R	-	c/j
36	36	1	Trunk	Light brown	Coarse	Flat	8	7	1	6mm	Asymptomatic	non-specific				c/j
	36	2	Trunk	Dark brown	Smooth	Flat				2mm	Asymptomatic	Reticular				c/j
	36	3	Trunk	Light brown	Smooth	Flat				2mm	Asymptomatic	Reticular				c/j
	36	4	Face	Light brown	Smooth	Flat				2mm	Asymptomatic	non-specific				c/j
	36	5	Face	Light brown	Smooth	Flat				2mm	Asymptomatic	non-specific				c/j
	36	6	Neck	Light brown	Smooth	Flat				2mm	Asymptomatic	non-specific				c/j
	36	7	Trunk	Light brown	Smooth	Flat				2mm	Asymptomatic	Reticular				c/j
	36	8	Trunk	Dark brown	Smooth	Flat				2mm	Asymptomatic	non-specific		N and R		c/j
37	37	1	Trunk	Light brown	Smooth	Flat	3	3	0	2mm	Asymptomatic	non-specific				c/j
	37	2	Trunk	Light brown	Smooth	Flat				3mm	Asymptomatic	Reticular				c/j
	37	3	Trunk	Light brown	Smooth	Flat				2mm	Asymptomatic	non-specific		N and R		c/j
38	38	1	Face	Light brown	Smooth	Flat	4	4	0	2mm	Asymptomatic	non-specific				c/j
	38	2	Face	Light brown	Smooth	Flat				2mm	Asymptomatic	non-specific				c/j
	38	3	Trunk	Flesh	Smooth	Mildly elevated				2mm	Asymptomatic	non-specific				i
	38	4	Face	Light brown	Coarse	Mildly elevated				4mm	Asymptomatic	non-specific		N		c
39	39	1	Scalp	Flesh	Papillomatous	Markedly elevated	14	8	6	8mm	Asymptomatic	non-specific				i
	39	2	Face	Light brown	Smooth	Flat				2mm	Asymptomatic	Reticular				c/j
	39	3	Face	Light brown	Smooth	Flat				2mm	Asymptomatic	non-specific				c/j
	39	4	Trunk	Light brown	Smooth	Flat				2mm	Asymptomatic	non-specific				c/j
	39	6	Trunk	Dark brown	Papillomatous	Mildly elevated				8mm	Asymptomatic	non-specific				i
	39	7	Extremities	Light brown	Coarse	Mildly elevated				7mm	Asymptomatic	non-specific				i
	39	8	Extremities	Light brown	Smooth	Mildly elevated				3mm	Asymptomatic	non-specific				i
	39	9	Extremities	Light brown	Smooth	Mildly elevated				2mm	Asymptomatic	non-specific				i
	39	10	Trunk	Dark brown	Papillomatous	Mildly elevated				5mm	Asymptomatic	non-specific				i
	39	11	Trunk	Flesh	Smooth	Mildly elevated				2mm	Asymptomatic	non-specific				i
	39	12	Extremities	Light brown	Smooth	Flat				2mm	Asymptomatic	Reticular				c/j
	39	13	Extremities	Flesh	Smooth	Mildly elevated				4mm	Asymptomatic	non-specific				i
	39	14	Extremities	Dark brown	Coarse	Markedly elevated				7mm	Asymptomatic	non-specific				i
	39	15	Genital area	Light brown	Smooth	Flat				6mm	Asymptomatic	non-specific		N		c/j
41	41	1	Face	Light brown	Smooth	Flat	13	12	1	3mm	Asymptomatic	Reticular				c/j
	41	2	Face	Light brown	Smooth	Flat				2.5mm	Asymptomatic	non-specific				c/j
	41	3	Extremities	Light brown	Smooth	Flat				2mm	Asymptomatic	non-specific				c/j
	41	4	Extremities	Light brown	Smooth	Flat				2mm	Asymptomatic	non-specific				c/j
	41	5	Face	Light brown	Smooth	Flat				3mm	Asymptomatic	non-specific				c/j
	41	6	Neck	Light brown	Smooth	Flat				2mm	Asymptomatic	non-specific
	41	8	Trunk	Light brown	Smooth	Mildly elevated				3mm	Asymptomatic	globular				i
	41	9	Trunk	Light brown	Smooth	Flat				4mm	Asymptomatic	Reticular				c/j
	41	10	Trunk	Others	Papillomatous	Markedly elevated				9mm	Itchy	non-specific				c
	41	11	Extremities	Dark brown	Smooth	Mildly elevated				2mm	Asymptomatic	non-specific				c/j
	41	12	Trunk	Light brown	Coarse	Mildly elevated				4mm	Asymptomatic	non-specific				c
	41	13	Extremities	Light brown	Smooth	Flat				2mm	Asymptomatic	Reticular				c/j
	41	14	Extremities	Light brown	Smooth	Flat				2mm	Asymptomatic	non-specific		R		c/j
42	42	1	Trunk	Dark brown	Smooth	Flat	2	2	0	3mm	Asymptomatic	non-specific				c/j
	42	2	Palms and soles	Blue	Smooth	Flat				2mm	Asymptomatic	non-specific		N		c/j
43	43	1	Extremities	Light brown	Smooth	Flat	3	3	0	3mm	Asymptomatic	non-specific				c/j
	43	2	Trunk	Flesh	Smooth	Flat				2mm	Asymptomatic	non-specific				c/j
	43	3	Trunk	Light brown	Smooth	Flat				2mm	Asymptomatic	Reticular		N and R		c/j
44	44	2	Neck	Light brown	Smooth	Flat	4	4	0	4mm	Asymptomatic	non-specific				c/j
	44	3	Trunk	Light brown	Smooth	Flat				2mm	Asymptomatic	non-specific				c/j
	44	5	Face	Light brown	Smooth	Flat				4mm	Asymptomatic	non-specific				c/j
	44	6	Extremities	Light brown	Coarse	Flat				2mm	Asymptomatic	non-specific		N		c/j
45	45	1	Face	Light brown	Smooth	Flat	1	1	0	2mm	Asymptomatic	non-specific		N		c/j
46	46	1	Extremities	Light brown	Smooth	Flat	7	7	0	3mm	Asymptomatic	Reticular				c/j
	46	2	Extremities	Dark brown	Smooth	Flat				2mm	Asymptomatic	non-specific				c/j
	46	3	Extremities	Flesh	Smooth	Mildly elevated				3mm	Asymptomatic	non-specific				i
	46	4	Extremities	Light brown	Smooth	Flat				2mm	Asymptomatic	non-specific				c/j
	46	5	Extremities	Light brown	Smooth	Flat				3mm	Asymptomatic	non-specific				c/j
	46	6	Extremities	Light brown	Smooth	Flat				3mm	Asymptomatic	non-specific				c/j
	46	7	Trunk	Dark brown	Smooth	Mildly elevated				2mm	Asymptomatic	non-specific		N		c
48	48	1	Neck	Dark brown	Smooth	Mildly elevated	2	2	0	3mm	Asymptomatic	non-specific				c
	48	2	Trunk	Light brown	Coarse	Flat				4mm	Asymptomatic	non-specific		N		c/j
49	49	1	Extremities	Light brown	Smooth	Flat	8	8	0	2mm	Asymptomatic	Reticular				c/j
	49	2	Extremities	Light brown	Smooth	Flat				3mm	Asymptomatic	Reticular				c/j
	49	3	Trunk	Light brown	Smooth	Flat				3mm	Asymptomatic	non-specific				c/j
	49	4	Trunk	Light brown	Smooth	Mildly elevated				4mm	Asymptomatic	non-specific				c
	49	5	Trunk	Light brown	Smooth	Flat				2mm	Asymptomatic	Reticular				c/j
	49	6	Trunk	Light brown	Smooth	Flat				2mm	Asymptomatic	Reticular				c/j
	49	7	Extremities	Light brown	Smooth	Flat				2mm	Asymptomatic	Reticular				c/j
	49	8	Extremities	Dark brown	Smooth	Flat				3mm	Asymptomatic	Reticular		R		c/j
50	50	1	Trunk	Dark brown	Smooth	Flat	24	19	5	6mm	Asymptomatic	Reticular				c/j
	50	2	Trunk	Dark brown	Smooth	Flat				4mm	Asymptomatic	Reticular				c/j
	50	3	Trunk	Dark brown	Smooth	Flat				2mm	Asymptomatic	Reticular				c/j
	50	4	Trunk	Light brown	Smooth	Flat				3mm	Asymptomatic	Reticular				c/j
	50	5	Neck	black	Smooth	Flat				2mm	Asymptomatic	non-specific				c/j
	50	6	Face	Light brown	Smooth	Flat				2mm	Asymptomatic	non-specific				c/j
	50	7	Scalp	Light brown	Smooth	Flat				2mm	Asymptomatic	Reticular				c/j
	50	8	Scalp	Dark brown	Smooth	Flat				2mm	Asymptomatic	non-specific				c/j
	50	9	Trunk	Light brown	Smooth	Flat				3mm	Asymptomatic	non-specific				c/j
	50	10	Trunk	Light brown	Smooth	Mildly elevated				3mm	Asymptomatic	non-specific				c
	50	11	Trunk	Dark brown	Smooth	Flat				5mm	Asymptomatic	Reticular				c/j
	50	12	Trunk	Dark brown	Smooth	Flat				3mm	Asymptomatic	Reticular				c/j
	50	13	Extremities	Dark brown	Smooth	Flat				2mm	Asymptomatic	Reticular				c/j
	50	14	Extremities	Light brown	Smooth	Flat				2mm	Asymptomatic	non-specific				c/j
	50	15	Extremities	Light brown	Smooth	Flat				2mm	Asymptomatic	non-specific				c/j
	50	16	Extremities	Light brown	Coarse	Flat				5mm	Asymptomatic	Reticular				c/j
	50	17	Extremities	Light brown	Smooth	Flat				2mm	Asymptomatic	non-specific				c/j
	50	18	Extremities	Dark brown	Coarse	Flat				2mm	Asymptomatic	non-specific				c/j
	50	19	Trunk	Dark brown	Papillomatous	Mildly elevated				7mm	Asymptomatic	non-specific				c
	50	20	Trunk	Dark brown	Smooth	Flat				2mm	Asymptomatic	non-specific				c/j
	50	21	Trunk	Light brown	Smooth	Flat				2mm	Asymptomatic	non-specific				c/j
	50	22	Extremities	Dark brown	Smooth	Flat				5mm	Itchy	non-specific				c/j
	50	23	Extremities	Light brown	Smooth	Flat				3mm	Asymptomatic	Reticular				c/j
	50	24	Extremities	Dark brown	Smooth	Flat				2mm	Asymptomatic	Reticular		N and R		c/j
51	51	2	Scalp	Flesh	Papillomatous	Markedly elevated	4	3	1	5mm	Asymptomatic	globular				c
	51	3	Neck	Light brown	Papillomatous	Mildly elevated				4mm	Asymptomatic	non-specific				i
	51	4	Extremities	Light brown	Smooth	Mildly elevated				2mm	Asymptomatic	non-specific				c
	51	5	Extremities	Light brown	Smooth	Mildly elevated				2mm	Asymptomatic	non-specific		N		c
53	53	1	Extremities	Light brown	Smooth	Flat	3	3	0	2mm	Asymptomatic	non-specific				c
	53	2	Extremities	Dark brown	Smooth	Flat				2mm	Asymptomatic	non-specific				c/j
	53	3	Face	Light brown	Smooth	Flat				2mm	Asymptomatic	non-specific		N		c/j
60	60	1	Trunk	Dark brown	Smooth	Flat	1	1	0	5mm	Asymptomatic	reticular		R		c/j
61	61	1	Extremities	Dark brown	Smooth	Flat	11	11	0	2mm	Asymptomatic	non-specific				c/j
	61	2	Others(左耳上)	Dark brown	Smooth	Mildly elevated				3mm	Asymptomatic	globular				c
	61	3	Trunk	Light brown	Smooth	Flat				3mm	Asymptomatic	non-specific				c/j
	61	4	Trunk	Dark brown	Smooth	Flat				2mm	Asymptomatic	reticular				c/j
	61	5	Trunk	Light brown	Smooth	Flat				3mm	Asymptomatic	reticular				c/j
	61	6	Trunk	Dark brown	Smooth	Flat				2mm	Asymptomatic	reticular				c/j
	61	7	Trunk	Light brown	Smooth	Flat				2mm	Asymptomatic	non-specific				c/j
	61	8	Trunk	Flesh	Smooth	Mildly elevated				4mm	Asymptomatic	globular				i
	61	9	Trunk	Black	Smooth	Flat				3mm	Asymptomatic	non-specific				c/j
	61	10	Palms and soles	Light brown	Smooth	Flat				2mm	Asymptomatic	non-specific				c/j
	61	11	Palms and soles	Light brown	Smooth	Flat				2mm	Asymptomatic	reticular		N and R		c/j
65	65	1	Trunk	Dark brown	Smooth	Flat	4	4	0	4mm	Asymptomatic	non-specific				c/j
	65	2	Trunk	Flesh	Smooth	Markedly elevated				2mm	Asymptomatic	non-specific				c
	65	3	Trunk	Light brown	Smooth	Markedly elevated				2mm	Asymptomatic	globular				c
	65	4	Trunk	Flesh	Smooth	Mildly elevated				2mm	Asymptomatic	non-specific		N		c
66	66	1	Trunk	Dark brown	Coarse	Mildly elevated	1	1	0	3mm	Asymptomatic	non-specific		N		c
67	67	1	Trunk	Light brown	Papillomatous	Mildly elevated	4	3	1	4mm	Asymptomatic	non-specific				i
	67	2	Trunk	Black	Coarse	Mildly elevated				5mm	Asymptomatic	globular				i
	67	3	Trunk	Dark brown	Smooth	Flat				2mm	Asymptomatic	reticular				c/j
	67	4	Trunk	Black	Smooth	Flat				3mm	Asymptomatic	reticular		R		c/j
68	68	1	Trunk	Dark brown	Smooth	Mildly elevated	5	5	0	3mm	Asymptomatic	non-specific				c
	68	2	Neck	Dark brown	Papillomatous	Mildly elevated				4mm	Asymptomatic	non-specific				c
	68	3	Neck	Dark brown	Coarse	Flat				3mm	Asymptomatic	non-specific				c/j
	68	4	Neck	Dark brown	Smooth	Flat				2mm	Asymptomatic	non-specific				c/j
	68	5	Scalp	Light brown	Smooth	Flat				2mm	Asymptomatic	non-specific		N		c/j
71	71	1	Neck	Black	Papillomatous	Markedly elevated	6	5	1	5mm	Asymptomatic	globular				c
	71	2	Neck	Light brown	Smooth	Flat				3mm	Asymptomatic	non-specific				c/j
	71	3	Neck	Light brown	Smooth	Flat				3mm	Asymptomatic	non-specific				c/j
	71	4	Face	Light brown	Smooth	Flat				3mm	Asymptomatic	non-specific				c/j
	71	5	Face	Light brown	Smooth	Flat				3mm	Asymptomatic	non-specific				c/j
	71	7	Face	Light brown	Smooth	Flat				3mm	Asymptomatic	non-specific		N		c/j
72	72	1	Face	Dark brown	Smooth	Flat	5	5	0	2mm	Asymptomatic	non-specific				c/j
	72	3	Extremities	Light brown	Smooth	Flat				2mm	Asymptomatic	non-specific				c/j
	72	4	Others(左耳上)	Light brown	Smooth	Flat				2mm	Asymptomatic	non-specific				c/j
	72	5	Trunk	Dark brown	Smooth	Flat				3mm	Asymptomatic	reticular				c/j
	72	6	Trunk	Dark brown	Smooth	Flat				3mm	Asymptomatic	reticular		N and R		c/j
73	73	1	Face	Flesh	Smooth	Markedly elevated	2	1	1	3mm	Asymptomatic	non-specific				i
	73	2	Trunk	black	Papillomatous	Markedly elevated				6mm	Asymptomatic	globular		N and G		c
74	74	1	Face	Flesh	Smooth	Mildly elevated	3	3	0	3mm	Asymptomatic	non-specific				i
	74	2	Trunk	Dark brown	Smooth	Mildly elevated				2mm	Asymptomatic	globular				c
	74	4	Trunk	Light brown	Smooth	Mildly elevated				3mm	Asymptomatic	non-specific		N and G		i
75	75	1	Face	Dark brown	Smooth	Flat	12	12	0	2mm	Asymptomatic	non-specific				c/j
	75	2	Face	Dark brown	Coarse	Mildly elevated				3mm	Asymptomatic	non-specific				c
	75	3	Palms and soles	Light brown	Smooth	Flat				2mm	Asymptomatic	reticular				c/j
	75	4	Palms and soles	Light brown	Smooth	Flat				2mm	Asymptomatic	reticular				c/j
	75	7	Neck	Light brown	Coarse	Flat				4mm	Asymptomatic	non-specific				c/j
	75	8	Neck	Dark brown	Smooth	Flat				2mm	Asymptomatic	non-specific				c/j
	75	9	Face	Light brown	Smooth	Flat				2mm	Asymptomatic	non-specific				c/j
	75	10	others(左耳后)	Light brown	Smooth	Flat				3mm	Asymptomatic	non-specific				c/j
	75	11	Face	Light brown	Smooth	Flat				2mm	Asymptomatic	non-specific				c/j
	75	12	others(左耳上)	Dark brown	Smooth	Flat				2mm	Asymptomatic	reticular				c/j
	75	13	Scalp	Light brown	Smooth	Flat				2mm	Asymptomatic	reticular				c/j
	75	14	Face	Light brown	Smooth	Flat				2mm	Asymptomatic	reticular		N and R		c/j
76	76	1	Trunk	Dark brown	Smooth	Flat	7	6	1	4mm	Asymptomatic	non-specific				c/j
	76	2	Face	Light brown	Smooth	Mildly elevated				5mm	Asymptomatic	non-specific				c
	76	3	Trunk	Dark brown	Smooth	Flat				4mm	Asymptomatic	reticular				c/j
	76	4	Trunk	Light brown	Smooth	Mildly elevated				2mm	Itchy	non-specific				c
	76	5	Trunk	Light brown	Smooth	Flat				3mm	Asymptomatic	reticular				c/j
	76	6	Neck	black	Smooth	Flat				2mm	Asymptomatic	non-specific				c/j
	76	7	Palms and soles	Dark brown	Smooth	Flat				2mm	Asymptomatic	non-specific		N		c/j
81	81	1	Neck	Dark brown	Coarse	Markedly elevated	2	2	0	4mm	Asymptomatic	globular				c
	81	2	Trunk	Light brown	Smooth	Mildly elevated				3mm	Asymptomatic	non-specific		N and G		c
82	82	1	Neck	Dark brown	Coarse	Mildly elevated	8	8	0	3mm	Asymptomatic	non-specific				c
	82	2	Face	Light brown	Smooth	Flat				2mm	Asymptomatic	reticular				c/j
	82	3	Face	Light brown	Smooth	Flat				2mm	Asymptomatic	non-specific				c/j
	82	4	other(左耳下)	Light brown	Smooth	Mildly elevated				2mm	Asymptomatic	non-specific				i
	82	5	Trunk	Dark brown	Smooth	Flat				2mm	Asymptomatic	non-specific				c/j
	82	6	Trunk	Light brown	Smooth	Flat				2mm	Asymptomatic	reticular				c/j
	82	7	Extremities	Light brown	Smooth	Mildly elevated				2mm	Asymptomatic	non-specific				i
	82	8	Face	Light brown	Smooth	Flat				2mm	Asymptomatic	non-specific		N		c/j
83	83	1	Trunk	Dark brown	Smooth	Flat	1	1	0	2.5mm	Asymptomatic	non-specific		N		c/j
84	84	2	Face	Dark brown	Smooth	Flat	6	6	0	2.5mm	Asymptomatic	non-specific				c/j
	84	3	Trunk	Light brown	Smooth	Flat				3mm	Asymptomatic	non-specific				c/j
	84	4	Face	Black	Coarse	Mildly elevated				3mm	Asymptomatic	non-specific				c
	84	5	Trunk	Light brown	Smooth	Flat				3.5mm	Asymptomatic	non-specific				c/j
	84	6	Extremities	Light brown	Coarse	Mildly elevated				3mm	Asymptomatic	non-specific				c
	84	7	Extremities	Light brown	Smooth	Flat				2mm	Asymptomatic	non-specific		N		c/j
89	89	2	Trunk	Light brown	Smooth	Flat	2	2	0	2.5mm	Asymptomatic	non-specific				c/j
	89	3	Trunk	Flesh	Coarse	Mildly elevated				3mm	Asymptomatic	non-specific		N		i
90	90	1	Neck	Dark brown	Papillomatous	Markedly elevated	12	8	4	5mm	Asymptomatic	globular				c
	90	2	Trunk	Flesh	Papillomatous	Markedly elevated				4mm	Asymptomatic	globular				c
	90	3	Neck	Dark brown	Coarse	Markedly elevated				5mm	Asymptomatic	globular				c
	90	4	Trunk	Dark brown	Coarse	Markedly elevated				5.5mm	Asymptomatic	globular				c
	90	5	Trunk	Light brown	Smooth	Flat				3mm	Asymptomatic	non-specific				c/j
	90	6	Trunk	Flesh	Papillomatous	Markedly elevated				5mm	Asymptomatic	non-specific				c
	90	7	Trunk	Dark brown	Smooth	Flat				2mm	Asymptomatic	non-specific				c/j
	90	8	Trunk	Light brown	Smooth	Flat				2mm	Asymptomatic	non-specific				c/j
	90	9	Neck	Light brown	Smooth	Flat				2.5mm	Asymptomatic	non-specific				c/j
	90	10	other(左耳)	Dark brown	Smooth	Flat				2.5mm	Asymptomatic	non-specific				c/j
	90	11	other(右耳后）	Light brown	Smooth	Flat				2mm	Asymptomatic	reticular				c/j
	90	12	Face	Light brown	Smooth	Flat				3mm	Asymptomatic	non-specific		N and G		c/j
93	93	1	Extremities	Light brown	Smooth	Flat	8	8	0	3mm	Asymptomatic	non-specific				c/j
	93	2	Extremities	Light brown	Smooth	Flat				2mm	Asymptomatic	non-specific				c/j
	93	3	Trunk	Light brown	Smooth	Flat				3mm	Asymptomatic	reticular				c/j
	93	4	Trunk	Dark brown	Smooth	Flat				2.5mm	Asymptomatic	reticular				c/j
	93	5	Trunk	Light brown	Smooth	Flat				2mm	Asymptomatic	reticular				c/j
	93	6	Trunk	Light brown	Smooth	Flat				2mm	Asymptomatic	reticular				c/j
	93	8	Extremities	Light brown	Smooth	Flat				2mm	Asymptomatic	reticular				c/j
	93	9	Extremities	Dark brown	Smooth	Flat				3mm	Asymptomatic	non-specific		N and R		c/j
94	94	1	Neck	Dark brown	Smooth	Flat	2	2	0	4mm	Asymptomatic	non-specific				c/j
	94	2	Face	Dark brown	Smooth	Flat				2mm	Asymptomatic	non-specific		N		c/j
95	95	1	Face	Flesh	Smooth	Markedly elevated	1	1	0	3mm	Asymptomatic	non-specific		N		c
96	96	1	Palms and soles	Light brown	Smooth	Flat	1	1	0	3mm	Asymptomatic	Parallel furrow		N		c/j
97	97	1	Extremities	Dark brown	Smooth	Mildly elevated	2	2	0	3mm	Asymptomatic	non-specific				c
	97	2	Neck	Dark brown	Smooth	Flat				2.5mm	Asymptomatic	non-specific		N		c/j
98	98	1	Trunk	Flesh	Coarse	Markedly elevated	1	1	0	3.5mm	Asymptomatic	non-specific		N		i
99	99	1	Trunk	Flesh	Papillomatous	Markedly elevated	1	0	1	6mm	Asymptomatic	non-specific		N		i
100	100	1	Trunk	Light brown	Smooth	Flat	1	1	0	3mm	Asymptomatic	reticular		R		c/j
101	101	1	Face	Dark brown	Smooth	Flat	7	7	0	2mm	Asymptomatic	non-specific				c/j
	101	2	other(左耳后）	Black	Coarse	Mildly elevated				2mm	Asymptomatic	non-specific				c
	101	3	Face	Light brown	Smooth	Flat				2mm	Asymptomatic	non-specific				c/j
	101	4	Extremities	Dark brown	Smooth	Flat				2mm	Asymptomatic	non-specific				c/j
	101	5	Extremities	Dark brown	Smooth	Flat				2mm	Asymptomatic	non-specific				c/j
	101	6	Trunk	Light brown	Smooth	Flat				2mm	Asymptomatic	non-specific				c/j
	101	7	Neck	Black	Smooth	Mildly elevated				2mm	Asymptomatic	non-specific		N		c
102	102	1	Trunk	Dark brown	Smooth	Flat	5	5	0	2mm	Asymptomatic	reticular				c/j
	102	2	Trunk	Black	Smooth	Flat				3mm	Asymptomatic	reticular				c/j
	102	3	Trunk	Dark brown	Smooth	Flat				2mm	Asymptomatic	reticular				c/j
	102	4	Palms and soles	Light brown	Smooth	Flat				2mm	Asymptomatic	non-specific				c/j
	102	5	Trunk	Light brown	Smooth	Flat				2.5mm	Asymptomatic	non-specific		N and R		c/j
103	103	1	Neck	Dark brown	Smooth	Flat	3	3	0	2mm	Asymptomatic	non-specific				c/j
	103	2	Face	Light brown	Smooth	Flat				2mm	Asymptomatic	non-specific				c/j
	103	3	Face	Light brown	Smooth	Flat				2mm	Asymptomatic	non-specific		N		c/j
104	104	2	Face	black	Smooth	Flat	1	1	0	2mm	Asymptomatic	non-specific		N		c/j
105	105	1	Face	Dark brown	Smooth	Mildly elevated	7	7	0	2.5mm	Asymptomatic	non-specific				c
	105	2	Face	Dark brown	Smooth	Flat				3mm	Asymptomatic	non-specific				c/j
	105	3	Face	black	Coarse	Mildly elevated				3mm	Asymptomatic	non-specific				c
	105	4	Trunk	Dark brown	Smooth	Flat				3mm	Asymptomatic	non-specific				c/j
	105	5	Trunk	blue	Smooth	Flat				2mm	Asymptomatic	non-specific				c/j
	105	6	Trunk	Light brown	Smooth	Flat				2mm	Asymptomatic	non-specific				c/j
	105	7	Trunk	Light brown	papillomatous	Mildly elevated				3mm	Asymptomatic	non-specific		N		i
106	106	1	Palms and soles	black	Smooth	Flat	3	3	0	2mm	Asymptomatic	non-specific				c/j
	106	2	Trunk	Light brown	Smooth	Flat				2.5mm	Asymptomatic	reticular				c/j
	106	3	Trunk	Light brown	Smooth	Flat				2mm	Asymptomatic	non-specific		N and R		c/j
107	107	1	Face	black	Papillomatous	Mildly elevated	14	14	0	4.5m	Asymptomatic	non-specific				c
	107	2	Face	Light brown	Smooth	Flat				2.5mm	Asymptomatic	reticular				c/j
	107	4	Face	Dark brown	Smooth	Flat				2mm	Asymptomatic	non-specific				c/j
	107	5	Face	Dark brown	Smooth	Flat				2mm	Asymptomatic	reticular				c/j
	107	6	Face	Light brown	Smooth	Flat				2mm	Asymptomatic	non-specific				c/j
	107	7	Face	Dark brown	Smooth	Flat				3mm	Asymptomatic	non-specific				c/j
	107	8	Face	Dark brown	Smooth	Flat				2mm	Asymptomatic	non-specific				c/j
	107	9	Face	Light brown	Smooth	Flat				3mm	Asymptomatic	non-specific				c/j
	107	10	Face	Light brown	Smooth	Flat				2mm	Asymptomatic	reticular				c/j
	107	11	Face	Dark brown	Smooth	Flat				3mm	Asymptomatic	reticular				c/j
	107	12	Face	Dark brown	Smooth	Flat				2.5mm	Asymptomatic	reticular				c/j
	107	13	Face	Light brown	Smooth	Flat				2.5mm	Asymptomatic	reticular				c/j
	107	14	Face	Light brown	Smooth	Flat				2mm	Asymptomatic	reticular				c/j
	107	15	Face	Light brown	Smooth	Flat				2mm	Asymptomatic	non-specific		N and R
108	108	1	Trunk	Light brown	Smooth	Mildly elevated	2	2	0	2mm	Asymptomatic	non-specific				i
	108	2	other(右耳下）	Light brown	Smooth	Flat				2.5mm	Asymptomatic	non-specific		N		c/j
109	109	1	Face	Dark brown	Smooth	Flat	7	7	0	2.5mm	Asymptomatic	non-specific				c/j
	109	2	Face	Light brown	Smooth	Flat				2mm	Asymptomatic	non-specific				c/j
	109	3	Face	Light brown	Smooth	Flat				2mm	Asymptomatic	non-specific				c/j
	109	4	other(右耳）	Light brown	Smooth	Flat				2mm	Asymptomatic	reticular				c/j
	109	5	Neck	Light brown	Smooth	Flat				2mm	Asymptomatic	reticular				c/j
	109	6	Extremities	Light brown	Smooth	Flat				2.5mm	Asymptomatic	reticular				c/j
	109	7	Trunk	Dark brown	Smooth	Flat				3mm	Asymptomatic	reticular		N and R		c/j
111	111	1	Face	Black	Coarse	Markedly elevated	6	6	0	3mm	Asymptomatic	non-specific				c
	111	2	Trunk	Dark brown	Smooth	Flat				3mm	Asymptomatic	reticular				c/j
	111	3	Trunk	Light brown	Smooth	Flat				2mm	Asymptomatic	reticular				c/j
	111	4	Trunk	Black	Smooth	Markedly elevated				2.5mm	Asymptomatic	non-specific				c
	111	5	Trunk	Dark brown	Smooth	Flat				2mm	Asymptomatic	reticular				c/j
	111	6	Trunk	Light brown	Smooth	Flat				2mm	Asymptomatic	non-specific		N and R		c/j
112	112	1	Face	Light brown	Smooth	Flat	6	5	1	2.5mm	Asymptomatic	non-specific				c/j
	112	2	Face	Light brown	Smooth	Flat				2.5mm	Asymptomatic	reticular				c/j
	112	3	Neck	Flesh	Papillomatous	Markedly elevated				5mm	Asymptomatic	globular				i
	112	6	other(左耳）	Light brown	Smooth	Flat				2mm	Asymptomatic	reticular				c/j
	112	8	Trunk	Light brown	Smooth	Flat				3mm	Asymptomatic	non-specific				c/j
	112	9	Trunk	Light brown	Smooth	Flat				2.5mm	Asymptomatic	non-specific		N and R		c/j
113	113	1	Face	Dark brown	Smooth	Flat	21	19	2	2.5mm	Asymptomatic	non-specific				c/j
	113	2	Face	Dark brown	Smooth	Flat				2mm	Asymptomatic	non-specific				c/j
	113	3	Face	Dark brown	Smooth	Flat				2mm	Asymptomatic	non-specific				c/j
	113	4	Face	Dark brown	Smooth	Flat				3mm	Asymptomatic	non-specific				c/j
	113	5	other(左耳前）	Black	Coarse	Markedly elevated				5mm	Asymptomatic	non-specific				c
	113	6	Face	Light brown	Smooth	Flat				2mm	Asymptomatic	non-specific				c/j
	113	7	Face	Light brown	Smooth	Flat				2mm	Asymptomatic	non-specific				c/j
	113	8	Face	Light brown	Smooth	Flat				2mm	Asymptomatic	non-specific				c/j
	113	9	Face	Dark brown	Smooth	Flat				2.5mm	Asymptomatic	non-specific				c/j
	113	10	Face	Light brown	Smooth	Flat				2mm	Asymptomatic	non-specific				c/j
	113	12	Trunk	Dark brown	Coarse	Mildly elevated				4mm	Asymptomatic	globular				c
	113	13	Extremities	Dark brown	Smooth	Flat				2.5mm	Asymptomatic	non-specific				c/j
	113	14	Extremities	Light brown	Smooth	Flat				2mm	Asymptomatic	non-specific				c/j
	113	15	Palms and soles	Light brown	Smooth	Flat				2mm	Asymptomatic	non-specific				c/j
	113	16	Palms and soles	Light brown	Smooth	Flat				2mm	Asymptomatic	reticular				c/j
	113	17	Extremities	Dark brown	Smooth	Flat				3mm	Asymptomatic	globular				c/j
	113	18	Extremities	Light brown	Smooth	Flat				2mm	Asymptomatic	non-specific				c/j
	113	19	Extremities	Dark brown	Smooth	Flat				3.5mm	Asymptomatic	non-specific				c/j
	113	20	Extremities	Dark brown	Smooth	Flat				3mm	Asymptomatic	non-specific				c/j
	113	21	Trunk	Black	Coarse	Mildly elevated				6mm	Asymptomatic	globular				c
	113	22	Trunk	Dark brown	Smooth	Flat				2mm	Asymptomatic	non-specific		N		c/i
114	114	1	other(左耳下)	Light brown	Smooth	Mildly elevated	7	6	1	5mm	Asymptomatic	non-specific				c
	114	3	Neck	Light brown	Smooth	Flat				3mm	Asymptomatic	non-specific				c/j
	114	4	Trunk	Dark brown	Smooth	Flat				2mm	Asymptomatic	non-specific				c/j
	114	5	Neck	Light brown	Smooth	Flat				2.5mm	Asymptomatic	non-specific				c/j
	114	6	Palms and soles	Light brown	Smooth	Flat				2mm	Asymptomatic	reticular				c/j
	114	7	Trunk	Dark brown	Smooth	Flat				3mm	Asymptomatic	reticular				c/j
	114	8	Extremities	Black	Smooth	Flat				2mm	Asymptomatic	non-specific		N		c/j
115	115	1	Face	Black	Coarse	Flat	4	4	0	3mm	Asymptomatic	non-specific				c/j
	115	2	Face	Light brown	Smooth	Flat				4mm	Asymptomatic	non-specific				c/j
	115	3	Neck	Light brown	Smooth	Flat				2mm	Asymptomatic	non-specific				c/j
	115	4	Neck	Light brown	Smooth	Flat				2mm	Asymptomatic	non-specific		N
